# Supplementary material
Source: PubMed Central journal article supplement (PMC4681479)
Supplement: DS_10.1177_0022034515606873.pdf [file DS_10.1177_0022034515606873.pdf]

# Slc26a3/Dra and Slc26a6 in Murine Ameloblasts

Journal of Dental Research  
DSI  
© International & American Associations  
for Dental Research 2015  
Reprints and permissions:  
sagepub.com/journalsPermissions.nav  
DOI: 10.1177/0022034515606873  
jdr.sagepub.com

R. Jalali<sup>1</sup>, B. Zandieh-Doulabi<sup>1</sup>, P.K. DenBesten<sup>2</sup>, U. Seidler<sup>3</sup>, B. Riederer<sup>3</sup>,  
S. Wedenoja<sup>4</sup>, D. Micha<sup>5</sup>, and A.L.J.J. Bronckers<sup>1</sup>

## Appendix

**Appendix Table.** Primers.

| Gene Variant | GenBank Access No. | Position    | Primer Sequence: Mouse Specific | Annealing Temperature, °C | Product Size, bp |
|--------------|--------------------|-------------|---------------------------------|---------------------------|------------------|
| SLC26A3      | NM_021353.2        | FW-SLC26A3  | 5' CTCTTTGTTCCTCCATAGCATCT 3'   | 56                        | 226              |
|              |                    | REV-SC26A3  | 5' AAACGGACCCACGGATATGT 3'      |                           |                  |
| SLC26A6      | NM_134420          | FW-SLC26A6  | 5' GCTTCGTGGTCACCTACCT 3'       | 56                        | 478              |
|              |                    | REV-SLC26A6 | 5' CCCAGTGAGATGGCAATG 3'        |                           |                  |
| Ywhaz        | NM_003406          | FW-Ywhaz    | 5' GATGAAGCCATTGCTGAACTTG 3'    | 56                        | 229              |
|              |                    | REV-Ywhaz   | 5' CTATTTGTGGGACAGCATGGA 3'     |                           |                  |

bp, base pairs.

<sup>1</sup>Department of Oral Cell Biology, Academic Centre for Dentistry Amsterdam, University of Amsterdam, and MOVE Research Institute, VU University Amsterdam, Amsterdam, Netherlands

<sup>2</sup>Department of Oral Sciences, University of California, San Francisco, CA, USA

<sup>3</sup>Abteilung Gastroenterologie, Hepatologie und Endokrinologie, Medizinische Hochschule Hannover, Hannover, Germany

<sup>4</sup>Department of Medical Genetics, Biomedicum Helsinki, University of Helsinki, Finland

<sup>5</sup>Department of Clinical Genetics, Vrije Universiteit Medical Center, Amsterdam, Netherlands

**Corresponding Author:**

A.L.J.J. Bronckers, Department of Oral Cell Biology, ACTA, Gustav Mahlerlaan 3004, 1081 LA, Amsterdam, The Netherlands.  
Email: a.bronckers@acta.nl
